# Supplementary material for: CKD Prevalence in the Military Health System: Coded Versus Uncoded CKD
Source: PubMed Central journal article supplement (PMC8350811; doi:10.1016/j.xkme.2021.03.015), 2021-06-02
Supplement: mmc1.pdf [file mmc1.pdf]

## **Supplemental Materials**

### *Table of Contents*

Supplemental Table 1: ICD-10 Codes to Identify CKD from the MDR

Supplemental Table 2: CPT Codes to Identify Dialysis Recipients from the MDR

Supplemental Table 3: ICD-10 Codes to Identify Dialysis Recipients from the MDR

Supplemental Table 4: CPT Codes to Identify Transplant Recipients from the MDR

Supplemental Table 5: ICD-10 Codes to Identify Transplant Recipients from the MDR

Supplemental Table 6: ICD-10 Codes to Identify Diagnosed Diabetes from the MDR

Supplemental Table 7: ICD-10 Codes to Identify Diagnosed Hypertension from the MDR

Supplemental Table 8: ICD-10 Codes to Identify Diagnosed Depression from the MDR

Supplemental Table 9: ICD-10 Codes to Identify Diagnosed HIV from the MDR

**Table S1: ICD-10 Codes to Identify CKD from the MDR**

| <b>Code(s)</b>                                                                                  | <b>Description</b>                              |
|-------------------------------------------------------------------------------------------------|-------------------------------------------------|
| N18.1, N18.2,<br>N18.3, N18.4,<br>N18.5, N18.6,<br>N18.9                                        | Chronic kidney disease                          |
| Q61.2, Q61.3                                                                                    | Polycystic kidney disease                       |
| N01.3, N08, N03.0,<br>N03.1, N03.2,<br>N03.3, N03.4,<br>N03.5, N03.6,<br>N03.7, N03.8,<br>N03.9 | Glomerulonephritis/nephritis/nephrotic syndrome |
| E08.22, E09.22,<br>E10.21, E10.22,<br>E10.29, E11.21,<br>E11.22, E11.29,<br>E13.22              | Diabetic nephropathy                            |
| I12.0, I12.9, I13.0,<br>I13.1, I13.2, I13.9                                                     | Hypertensive nephrosclerosis                    |

**Table S2: CPT Codes to Identify Dialysis Recipients from the MDR (1)**

| <b>Code</b>         | <b>Description</b>                                                                        |
|---------------------|-------------------------------------------------------------------------------------------|
| 3066F               | Documentation of treatment for nephropathy                                                |
| 36800, 36810, 36815 | Insertion of cannula for hemodialysis, other purpose...                                   |
| 36818 - 36820       | Arteriovenous anastomosis, open...                                                        |
| 36821, 36831        | Thrombectomy, open, arteriovenous fistula...                                              |
| 36832, 36833        | Revision, open, arteriovenous fistula...                                                  |
| 90935, 90937        | Hemodialysis procedure with single evaluation...                                          |
| 90940               | Hemodialysis access flow study to determine blood flow...                                 |
| 90945, 90947        | Dialysis procedure other than hemodialysis...                                             |
| 90951 - 90962       | ESRD related services monthly...                                                          |
| 90963 - 90966       | ESRD related services for home dialysis per full month...                                 |
| 90967 - 90970       | ESRD related services for dialysis less than a full month...                              |
| 90989, 90993        | Dialysis training, patient, including helper...                                           |
| 90997               | Hemoperfusion                                                                             |
| 90999, 99512        | Unlisted dialysis procedure, inpatient or outpatient...                                   |
| G0257               | Unscheduled or emergency dialysis treatment for an ESRD...                                |
| G9231               | Documentation of ESRD, dialysis, renal transplant...                                      |
| S2065               | Simultaneous pancreas kidney transplantation...                                           |
| S9339               | Home therapy; peritoneal dialysis, administrative...                                      |
| 36145               | Introduction of needle or intracatheter; arteriovenous shunt created for dialysis...      |
| 36147               | Introduction of needle and/or catheter, arteriovenous shunt created for dialysis...       |
| 90918 - 90921       | ESRD related services per full month...                                                   |
| 90925               | ESRD related services (less than full month)...                                           |
| G0308 – G0319       | ESRD related services during the course of treatment...                                   |
| G0320 – G0323       | ESRD related services for home dialysis patients per full month...                        |
| G0324 – G0327       | ESRD related services for home dialysis (less than full month)...                         |
| G0392, G0393        | Transluminal balloon angioplasty, percutaneous; for maintenance of hemodialysis access... |

**Table S3: ICD-10 Codes to Identify Dialysis Recipients from the MDR (1)**

| <b>Code</b> | <b>Description</b>                          |
|-------------|---------------------------------------------|
| N18.6       | End stage renal disease                     |
| Z49         | Encounter for care involving renal dialysis |
| Z91.15      | Patient's noncompliance with renal dialysis |
| Z99.2       | Dependence on renal dialysis                |

**Table S4: CPT Codes to Identify Transplant Recipients from the MDR (1)**

| <b>Code</b>  | <b>Description</b>                                                                                                            |
|--------------|-------------------------------------------------------------------------------------------------------------------------------|
| 00868        | Anesthesia for extraperitoneal procedures in lower abdomen, including urinary tract; renal transplant (recipient) (units: 10) |
| 50340        | Recipient nephrectomy (separate procedure)                                                                                    |
| 50360, 50365 | Renal allotransplantation; implantation of graft...                                                                           |
| 50380        | Renal autotransplantation, reimplantation of kidney                                                                           |

**Table S5: ICD-10 Codes to Identify Transplant Recipients from the MDR**

| <b>Code</b> | <b>Description</b>       |
|-------------|--------------------------|
| Z94.0       | Kidney transplant status |

**Table S6: ICD-10 Codes to Identify Diagnosed Diabetes from the MDR**

| <b>Code</b> | <b>Description</b>                                                                                               |
|-------------|------------------------------------------------------------------------------------------------------------------|
| E10.10      | Type 1 diabetes mellitus with ketoacidosis without coma                                                          |
| E10.11      | Type 1 diabetes mellitus with ketoacidosis with coma                                                             |
| E10.21      | Type 1 diabetes mellitus with diabetic nephropathy                                                               |
| E10.22      | Type 1 diabetes mellitus with diabetic chronic kidney disease                                                    |
| E10.29      | Type 1 diabetes mellitus with other diabetic kidney complication                                                 |
| E10.311     | Type 1 diabetes mellitus with unspecified diabetic retinopathy with macular edema                                |
| E10.319     | Type 1 diabetes mellitus with unspecified diabetic retinopathy without macular edema                             |
| E10.321     | Type 1 diabetes mellitus with mild nonproliferative diabetic retinopathy with macular edema                      |
| E10.3211    | Type 1 diabetes mellitus with mild nonproliferative diabetic retinopathy with macular edema, right eye           |
| E10.3212    | Type 1 diabetes mellitus with mild nonproliferative diabetic retinopathy with macular edema, left eye            |
| E10.3213    | Type 1 diabetes mellitus with mild nonproliferative diabetic retinopathy with macular edema, bilateral           |
| E10.3219    | Type 1 diabetes mellitus with mild nonproliferative diabetic retinopathy with macular edema, unspecified eye     |
| E10.329     | Type 1 diabetes mellitus with mild nonproliferative diabetic retinopathy without macular edema                   |
| E10.3291    | Type 1 diabetes mellitus with mild nonproliferative diabetic retinopathy without macular edema, right eye        |
| E10.3292    | Type 1 diabetes mellitus with mild nonproliferative diabetic retinopathy without macular edema, left eye         |
| E10.3293    | Type 1 diabetes mellitus with mild nonproliferative diabetic retinopathy without macular edema, bilateral        |
| E10.3299    | Type 1 diabetes mellitus with mild nonproliferative diabetic retinopathy without macular edema, unspecified eye  |
| E10.331     | Type 1 diabetes mellitus with moderate nonproliferative diabetic retinopathy with macular edema                  |
| E10.3311    | Type 1 diabetes mellitus with moderate nonproliferative diabetic retinopathy with macular edema, right eye       |
| E10.3312    | Type 1 diabetes mellitus with moderate nonproliferative diabetic retinopathy with macular edema, left eye        |
| E10.3313    | Type 1 diabetes mellitus with moderate nonproliferative diabetic retinopathy with macular edema, bilateral       |
| E10.3319    | Type 1 diabetes mellitus with moderate nonproliferative diabetic retinopathy with macular edema, unspecified eye |
| E10.339     | Type 1 diabetes mellitus with moderate nonproliferative diabetic retinopathy without macular edema               |
| E10.3391    | Type 1 diabetes mellitus with moderate nonproliferative diabetic retinopathy without macular edema, right eye    |
| E10.3392    | Type 1 diabetes mellitus with moderate nonproliferative diabetic retinopathy without macular edema, left eye     |

|          |                                                                                                                                             |
|----------|---------------------------------------------------------------------------------------------------------------------------------------------|
| E10.3393 | Type 1 diabetes mellitus with moderate nonproliferative diabetic retinopathy without macular edema, bilateral                               |
| E10.3399 | Type 1 diabetes mellitus with moderate nonproliferative diabetic retinopathy without macular edema, unspecified eye                         |
| E10.341  | Type 1 diabetes mellitus with severe nonproliferative diabetic retinopathy with macular edema                                               |
| E10.3411 | Type 1 diabetes mellitus with severe nonproliferative diabetic retinopathy with macular edema, right eye                                    |
| E10.3412 | Type 1 diabetes mellitus with severe nonproliferative diabetic retinopathy with macular edema, left eye                                     |
| E10.3413 | Type 1 diabetes mellitus with severe nonproliferative diabetic retinopathy with macular edema, bilateral                                    |
| E10.3419 | Type 1 diabetes mellitus with severe nonproliferative diabetic retinopathy with macular edema, unspecified eye                              |
| E10.349  | Type 1 diabetes mellitus with severe nonproliferative diabetic retinopathy without macular edema                                            |
| E10.3491 | Type 1 diabetes mellitus with severe nonproliferative diabetic retinopathy without macular edema, right eye                                 |
| E10.3492 | Type 1 diabetes mellitus with severe nonproliferative diabetic retinopathy without macular edema, left eye                                  |
| E10.3493 | Type 1 diabetes mellitus with severe nonproliferative diabetic retinopathy without macular edema, bilateral                                 |
| E10.3499 | Type 1 diabetes mellitus with severe nonproliferative diabetic retinopathy without macular edema, unspecified eye                           |
| E10.351  | Type 1 diabetes mellitus with proliferative diabetic retinopathy with macular edema                                                         |
| E10.3511 | Type 1 diabetes mellitus with proliferative diabetic retinopathy with macular edema, right eye                                              |
| E10.3512 | Type 1 diabetes mellitus with proliferative diabetic retinopathy with macular edema, left eye                                               |
| E10.3513 | Type 1 diabetes mellitus with proliferative diabetic retinopathy with macular edema, bilateral                                              |
| E10.3519 | Type 1 diabetes mellitus with proliferative diabetic retinopathy with macular edema, unspecified eye                                        |
| E10.3521 | Type 1 diabetes mellitus with proliferative diabetic retinopathy with traction retinal detachment involving the macula, right eye           |
| E10.3522 | Type 1 diabetes mellitus with proliferative diabetic retinopathy with traction retinal detachment involving the macula, left eye            |
| E10.3523 | Type 1 diabetes mellitus with proliferative diabetic retinopathy with traction retinal detachment involving the macula, bilateral           |
| E10.3529 | Type 1 diabetes mellitus with proliferative diabetic retinopathy with traction retinal detachment involving the macula, unspecified eye     |
| E10.3531 | Type 1 diabetes mellitus with proliferative diabetic retinopathy with traction retinal detachment not involving the macula, right eye       |
| E10.3532 | Type 1 diabetes mellitus with proliferative diabetic retinopathy with traction retinal detachment not involving the macula, left eye        |
| E10.3533 | Type 1 diabetes mellitus with proliferative diabetic retinopathy with traction retinal detachment not involving the macula, bilateral       |
| E10.3539 | Type 1 diabetes mellitus with proliferative diabetic retinopathy with traction retinal detachment not involving the macula, unspecified eye |



|          |                                                                                                                                                                   |
|----------|-------------------------------------------------------------------------------------------------------------------------------------------------------------------|
| E10.3541 | Type 1 diabetes mellitus with proliferative diabetic retinopathy with combined traction retinal detachment and rhegmatogenous retinal detachment, right eye       |
| E10.3542 | Type 1 diabetes mellitus with proliferative diabetic retinopathy with combined traction retinal detachment and rhegmatogenous retinal detachment, left eye        |
| E10.3543 | Type 1 diabetes mellitus with proliferative diabetic retinopathy with combined traction retinal detachment and rhegmatogenous retinal detachment, bilateral       |
| E10.3549 | Type 1 diabetes mellitus with proliferative diabetic retinopathy with combined traction retinal detachment and rhegmatogenous retinal detachment, unspecified eye |
| E10.3551 | Type 1 diabetes mellitus with stable proliferative diabetic retinopathy, right eye                                                                                |
| E10.3552 | Type 1 diabetes mellitus with stable proliferative diabetic retinopathy, left eye                                                                                 |
| E10.3553 | Type 1 diabetes mellitus with stable proliferative diabetic retinopathy, bilateral                                                                                |
| E10.3559 | Type 1 diabetes mellitus with stable proliferative diabetic retinopathy, unspecified eye                                                                          |
| E10.359  | Type 1 diabetes mellitus with proliferative diabetic retinopathy without macular edema                                                                            |
| E10.3591 | Type 1 diabetes mellitus with proliferative diabetic retinopathy without macular edema, right eye                                                                 |
| E10.3592 | Type 1 diabetes mellitus with proliferative diabetic retinopathy without macular edema, left eye                                                                  |
| E10.3593 | Type 1 diabetes mellitus with proliferative diabetic retinopathy without macular edema, bilateral                                                                 |
| E10.3599 | Type 1 diabetes mellitus with proliferative diabetic retinopathy without macular edema, unspecified eye                                                           |
| E10.36   | Type 1 diabetes mellitus with diabetic cataract                                                                                                                   |
| E10.37X1 | Type 1 diabetes mellitus with diabetic macular edema, resolved following treatment, right eye                                                                     |
| E10.37X2 | Type 1 diabetes mellitus with diabetic macular edema, resolved following treatment, left eye                                                                      |
| E10.37X3 | Type 1 diabetes mellitus with diabetic macular edema, resolved following treatment, bilateral                                                                     |
| E10.37X9 | Type 1 diabetes mellitus with diabetic macular edema, resolved following treatment, unspecified eye                                                               |
| E10.39   | Type 1 diabetes mellitus with other diabetic ophthalmic complication                                                                                              |
| E10.40   | Type 1 diabetes mellitus with diabetic neuropathy, unspecified                                                                                                    |
| E10.41   | Type 1 diabetes mellitus with diabetic mononeuropathy                                                                                                             |
| E10.42   | Type 1 diabetes mellitus with diabetic polyneuropathy                                                                                                             |
| E10.43   | Type 1 diabetes mellitus with diabetic autonomic (poly)neuropathy                                                                                                 |
| E10.44   | Type 1 diabetes mellitus with diabetic amyotrophy                                                                                                                 |
| E10.49   | Type 1 diabetes mellitus with other diabetic neurological complication                                                                                            |
| E10.51   | Type 1 diabetes mellitus with diabetic peripheral angiopathy without gangrene                                                                                     |

|          |                                                                                                              |
|----------|--------------------------------------------------------------------------------------------------------------|
| E10.52   | Type 1 diabetes mellitus with diabetic peripheral angiopathy with gangrene                                   |
| E10.59   | Type 1 diabetes mellitus with other circulatory complications                                                |
| E10.610  | Type 1 diabetes mellitus with diabetic neuropathic arthropathy                                               |
| E10.618  | Type 1 diabetes mellitus with other diabetic arthropathy                                                     |
| E10.620  | Type 1 diabetes mellitus with diabetic dermatitis                                                            |
| E10.621  | Type 1 diabetes mellitus with foot ulcer                                                                     |
| E10.622  | Type 1 diabetes mellitus with other skin ulcer                                                               |
| E10.628  | Type 1 diabetes mellitus with other skin complications                                                       |
| E10.630  | Type 1 diabetes mellitus with periodontal disease                                                            |
| E10.638  | Type 1 diabetes mellitus with other oral complications                                                       |
| E10.641  | Type 1 diabetes mellitus with hypoglycemia with coma                                                         |
| E10.649  | Type 1 diabetes mellitus with hypoglycemia without coma                                                      |
| E10.65   | Type 1 diabetes mellitus with hyperglycemia                                                                  |
| E10.69   | Type 1 diabetes mellitus with other specified complication                                                   |
| E10.8    | Type 1 diabetes mellitus with unspecified complications                                                      |
| E10.9    | Type 1 diabetes mellitus without complications                                                               |
| E11.00   | Type 2 diabetes mellitus with hyperosmolarity without nonketotic hyperglycemic-hyperosmolar coma (NKHHC)     |
| E11.01   | Type 2 diabetes mellitus with hyperosmolarity with coma                                                      |
| E11.10   | Type 2 diabetes mellitus with ketoacidosis without coma                                                      |
| E11.11   | Type 2 diabetes mellitus with ketoacidosis with coma                                                         |
| E11.21   | Type 2 diabetes mellitus with diabetic nephropathy                                                           |
| E11.22   | Type 2 diabetes mellitus with diabetic chronic kidney disease                                                |
| E11.29   | Type 2 diabetes mellitus with other diabetic kidney complication                                             |
| E11.311  | Type 2 diabetes mellitus with unspecified diabetic retinopathy with macular edema                            |
| E11.319  | Type 2 diabetes mellitus with unspecified diabetic retinopathy without macular edema                         |
| E11.321  | Type 2 diabetes mellitus with mild nonproliferative diabetic retinopathy with macular edema                  |
| E11.3211 | Type 2 diabetes mellitus with mild nonproliferative diabetic retinopathy with macular edema, right eye       |
| E11.3212 | Type 2 diabetes mellitus with mild nonproliferative diabetic retinopathy with macular edema, left eye        |
| E11.3213 | Type 2 diabetes mellitus with mild nonproliferative diabetic retinopathy with macular edema, bilateral       |
| E11.3219 | Type 2 diabetes mellitus with mild nonproliferative diabetic retinopathy with macular edema, unspecified eye |
| E11.329  | Type 2 diabetes mellitus with mild nonproliferative diabetic retinopathy without macular edema               |
| E11.3291 | Type 2 diabetes mellitus with mild nonproliferative diabetic retinopathy without macular edema, right eye    |

|          |                                                                                                                     |
|----------|---------------------------------------------------------------------------------------------------------------------|
| E11.3292 | Type 2 diabetes mellitus with mild nonproliferative diabetic retinopathy without macular edema, left eye            |
| E11.3293 | Type 2 diabetes mellitus with mild nonproliferative diabetic retinopathy without macular edema, bilateral           |
| E11.3299 | Type 2 diabetes mellitus with mild nonproliferative diabetic retinopathy without macular edema, unspecified eye     |
| E11.331  | Type 2 diabetes mellitus with moderate nonproliferative diabetic retinopathy with macular edema                     |
| E11.3311 | Type 2 diabetes mellitus with moderate nonproliferative diabetic retinopathy with macular edema, right eye          |
| E11.3312 | Type 2 diabetes mellitus with moderate nonproliferative diabetic retinopathy with macular edema, left eye           |
| E11.3313 | Type 2 diabetes mellitus with moderate nonproliferative diabetic retinopathy with macular edema, bilateral          |
| E11.3319 | Type 2 diabetes mellitus with moderate nonproliferative diabetic retinopathy with macular edema, unspecified eye    |
| E11.339  | Type 2 diabetes mellitus with moderate nonproliferative diabetic retinopathy without macular edema                  |
| E11.3391 | Type 2 diabetes mellitus with moderate nonproliferative diabetic retinopathy without macular edema, right eye       |
| E11.3392 | Type 2 diabetes mellitus with moderate nonproliferative diabetic retinopathy without macular edema, left eye        |
| E11.3393 | Type 2 diabetes mellitus with moderate nonproliferative diabetic retinopathy without macular edema, bilateral       |
| E11.3399 | Type 2 diabetes mellitus with moderate nonproliferative diabetic retinopathy without macular edema, unspecified eye |
| E11.341  | Type 2 diabetes mellitus with severe nonproliferative diabetic retinopathy with macular edema                       |
| E11.3411 | Type 2 diabetes mellitus with severe nonproliferative diabetic retinopathy with macular edema, right eye            |
| E11.3412 | Type 2 diabetes mellitus with severe nonproliferative diabetic retinopathy with macular edema, left eye             |
| E11.3413 | Type 2 diabetes mellitus with severe nonproliferative diabetic retinopathy with macular edema, bilateral            |
| E11.3419 | Type 2 diabetes mellitus with severe nonproliferative diabetic retinopathy with macular edema, unspecified eye      |
| E11.349  | Type 2 diabetes mellitus with severe nonproliferative diabetic retinopathy without macular edema                    |
| E11.3491 | Type 2 diabetes mellitus with severe nonproliferative diabetic retinopathy without macular edema, right eye         |

|          |                                                                                                                                                                   |
|----------|-------------------------------------------------------------------------------------------------------------------------------------------------------------------|
| E11.3492 | Type 2 diabetes mellitus with severe nonproliferative diabetic retinopathy without macular edema, left eye                                                        |
| E11.3493 | Type 2 diabetes mellitus with severe nonproliferative diabetic retinopathy without macular edema, bilateral                                                       |
| E11.3499 | Type 2 diabetes mellitus with severe nonproliferative diabetic retinopathy without macular edema, unspecified eye                                                 |
| E11.351  | Type 2 diabetes mellitus with proliferative diabetic retinopathy with macular edema                                                                               |
| E11.3511 | Type 2 diabetes mellitus with proliferative diabetic retinopathy with macular edema, right eye                                                                    |
| E11.3512 | Type 2 diabetes mellitus with proliferative diabetic retinopathy with macular edema, left eye                                                                     |
| E11.3513 | Type 2 diabetes mellitus with proliferative diabetic retinopathy with macular edema, bilateral                                                                    |
| E11.3519 | Type 2 diabetes mellitus with proliferative diabetic retinopathy with macular edema, unspecified eye                                                              |
| E11.3521 | Type 2 diabetes mellitus with proliferative diabetic retinopathy with traction retinal detachment involving the macula, right eye                                 |
| E11.3522 | Type 2 diabetes mellitus with proliferative diabetic retinopathy with traction retinal detachment involving the macula, left eye                                  |
| E11.3523 | Type 2 diabetes mellitus with proliferative diabetic retinopathy with traction retinal detachment involving the macula, bilateral                                 |
| E11.3529 | Type 2 diabetes mellitus with proliferative diabetic retinopathy with traction retinal detachment involving the macula, unspecified eye                           |
| E11.3531 | Type 2 diabetes mellitus with proliferative diabetic retinopathy with traction retinal detachment not involving the macula, right eye                             |
| E11.3532 | Type 2 diabetes mellitus with proliferative diabetic retinopathy with traction retinal detachment not involving the macula, left eye                              |
| E11.3533 | Type 2 diabetes mellitus with proliferative diabetic retinopathy with traction retinal detachment not involving the macula, bilateral                             |
| E11.3539 | Type 2 diabetes mellitus with proliferative diabetic retinopathy with traction retinal detachment not involving the macula, unspecified eye                       |
| E11.3541 | Type 2 diabetes mellitus with proliferative diabetic retinopathy with combined traction retinal detachment and rhegmatogenous retinal detachment, right eye       |
| E11.3542 | Type 2 diabetes mellitus with proliferative diabetic retinopathy with combined traction retinal detachment and rhegmatogenous retinal detachment, left eye        |
| E11.3543 | Type 2 diabetes mellitus with proliferative diabetic retinopathy with combined traction retinal detachment and rhegmatogenous retinal detachment, bilateral       |
| E11.3549 | Type 2 diabetes mellitus with proliferative diabetic retinopathy with combined traction retinal detachment and rhegmatogenous retinal detachment, unspecified eye |

|          |                                                                                                         |
|----------|---------------------------------------------------------------------------------------------------------|
| E11.3551 | Type 2 diabetes mellitus with stable proliferative diabetic retinopathy, right eye                      |
| E11.3552 | Type 2 diabetes mellitus with stable proliferative diabetic retinopathy, left eye                       |
| E11.3553 | Type 2 diabetes mellitus with stable proliferative diabetic retinopathy, bilateral                      |
| E11.3559 | Type 2 diabetes mellitus with stable proliferative diabetic retinopathy, unspecified eye                |
| E11.359  | Type 2 diabetes mellitus with proliferative diabetic retinopathy without macular edema                  |
| E11.3591 | Type 2 diabetes mellitus with proliferative diabetic retinopathy without macular edema, right eye       |
| E11.3592 | Type 2 diabetes mellitus with proliferative diabetic retinopathy without macular edema, left eye        |
| E11.3593 | Type 2 diabetes mellitus with proliferative diabetic retinopathy without macular edema, bilateral       |
| E11.3599 | Type 2 diabetes mellitus with proliferative diabetic retinopathy without macular edema, unspecified eye |
| E11.36   | Type 2 diabetes mellitus with diabetic cataract                                                         |
| E11.37X1 | Type 2 diabetes mellitus with diabetic macular edema, resolved following treatment, right eye           |
| E11.37X2 | Type 2 diabetes mellitus with diabetic macular edema, resolved following treatment, left eye            |
| E11.37X3 | Type 2 diabetes mellitus with diabetic macular edema, resolved following treatment, bilateral           |
| E11.37X9 | Type 2 diabetes mellitus with diabetic macular edema, resolved following treatment, unspecified eye     |
| E11.39   | Type 2 diabetes mellitus with other diabetic ophthalmic complication                                    |
| E11.40   | Type 2 diabetes mellitus with diabetic neuropathy, unspecified                                          |
| E11.41   | Type 2 diabetes mellitus with diabetic mononeuropathy                                                   |
| E11.42   | Type 2 diabetes mellitus with diabetic polyneuropathy                                                   |
| E11.43   | Type 2 diabetes mellitus with diabetic autonomic (poly)neuropathy                                       |
| E11.44   | Type 2 diabetes mellitus with diabetic amyotrophy                                                       |
| E11.49   | Type 2 diabetes mellitus with other diabetic neurological complication                                  |
| E11.51   | Type 2 diabetes mellitus with diabetic peripheral angiopathy without gangrene                           |
| E11.52   | Type 2 diabetes mellitus with diabetic peripheral angiopathy with gangrene                              |
| E11.59   | Type 2 diabetes mellitus with other circulatory complications                                           |
| E11.610  | Type 2 diabetes mellitus with diabetic neuropathic arthropathy                                          |
| E11.618  | Type 2 diabetes mellitus with other diabetic arthropathy                                                |
| E11.620  | Type 2 diabetes mellitus with diabetic dermatitis                                                       |
| E11.621  | Type 2 diabetes mellitus with foot ulcer                                                                |
| E11.622  | Type 2 diabetes mellitus with other skin ulcer                                                          |
| E11.628  | Type 2 diabetes mellitus with other skin complications                                                  |

|          |                                                                                                                          |
|----------|--------------------------------------------------------------------------------------------------------------------------|
| E11.630  | Type 2 diabetes mellitus with periodontal disease                                                                        |
| E11.638  | Type 2 diabetes mellitus with other oral complications                                                                   |
| E11.641  | Type 2 diabetes mellitus with hypoglycemia with coma                                                                     |
| E11.649  | Type 2 diabetes mellitus with hypoglycemia without coma                                                                  |
| E11.65   | Type 2 diabetes mellitus with hyperglycemia                                                                              |
| E11.69   | Type 2 diabetes mellitus with other specified complication                                                               |
| E11.8    | Type 2 diabetes mellitus with unspecified complications                                                                  |
| E11.9    | Type 2 diabetes mellitus without complications                                                                           |
| E13.00   | Other specified diabetes mellitus with hyperosmolarity without nonketotic hyperglycemic-hyperosmolar coma (NKHHC)        |
| E13.01   | Other specified diabetes mellitus with hyperosmolarity with coma                                                         |
| E13.10   | Other specified diabetes mellitus with ketoacidosis without coma                                                         |
| E13.11   | Other specified diabetes mellitus with ketoacidosis with coma                                                            |
| E13.21   | Other specified diabetes mellitus with diabetic nephropathy                                                              |
| E13.22   | Other specified diabetes mellitus with diabetic chronic kidney disease                                                   |
| E13.29   | Other specified diabetes mellitus with other diabetic kidney complication                                                |
| E13.311  | Other specified diabetes mellitus with unspecified diabetic retinopathy with macular edema                               |
| E13.319  | Other specified diabetes mellitus with unspecified diabetic retinopathy without macular edema                            |
| E13.321  | Other specified diabetes mellitus with mild nonproliferative diabetic retinopathy with macular edema                     |
| E13.3211 | Other specified diabetes mellitus with mild nonproliferative diabetic retinopathy with macular edema, right eye          |
| E13.3212 | Other specified diabetes mellitus with mild nonproliferative diabetic retinopathy with macular edema, left eye           |
| E13.3213 | Other specified diabetes mellitus with mild nonproliferative diabetic retinopathy with macular edema, bilateral          |
| E13.3219 | Other specified diabetes mellitus with mild nonproliferative diabetic retinopathy with macular edema, unspecified eye    |
| E13.329  | Other specified diabetes mellitus with mild nonproliferative diabetic retinopathy without macular edema                  |
| E13.3291 | Other specified diabetes mellitus with mild nonproliferative diabetic retinopathy without macular edema, right eye       |
| E13.3292 | Other specified diabetes mellitus with mild nonproliferative diabetic retinopathy without macular edema, left eye        |
| E13.3293 | Other specified diabetes mellitus with mild nonproliferative diabetic retinopathy without macular edema, bilateral       |
| E13.3299 | Other specified diabetes mellitus with mild nonproliferative diabetic retinopathy without macular edema, unspecified eye |

|          |                                                                                                                              |
|----------|------------------------------------------------------------------------------------------------------------------------------|
| E13.331  | Other specified diabetes mellitus with moderate nonproliferative diabetic retinopathy with macular edema                     |
| E13.3311 | Other specified diabetes mellitus with moderate nonproliferative diabetic retinopathy with macular edema, right eye          |
| E13.3312 | Other specified diabetes mellitus with moderate nonproliferative diabetic retinopathy with macular edema, left eye           |
| E13.3313 | Other specified diabetes mellitus with moderate nonproliferative diabetic retinopathy with macular edema, bilateral          |
| E13.3319 | Other specified diabetes mellitus with moderate nonproliferative diabetic retinopathy with macular edema, unspecified eye    |
| E13.339  | Other specified diabetes mellitus with moderate nonproliferative diabetic retinopathy without macular edema                  |
| E13.3391 | Other specified diabetes mellitus with moderate nonproliferative diabetic retinopathy without macular edema, right eye       |
| E13.3392 | Other specified diabetes mellitus with moderate nonproliferative diabetic retinopathy without macular edema, left eye        |
| E13.3393 | Other specified diabetes mellitus with moderate nonproliferative diabetic retinopathy without macular edema, bilateral       |
| E13.3399 | Other specified diabetes mellitus with moderate nonproliferative diabetic retinopathy without macular edema, unspecified eye |
| E13.341  | Other specified diabetes mellitus with severe nonproliferative diabetic retinopathy with macular edema                       |
| E13.3411 | Other specified diabetes mellitus with severe nonproliferative diabetic retinopathy with macular edema, right eye            |
| E13.3412 | Other specified diabetes mellitus with severe nonproliferative diabetic retinopathy with macular edema, left eye             |
| E13.3413 | Other specified diabetes mellitus with severe nonproliferative diabetic retinopathy with macular edema, bilateral            |
| E13.3419 | Other specified diabetes mellitus with severe nonproliferative diabetic retinopathy with macular edema, unspecified eye      |
| E13.349  | Other specified diabetes mellitus with severe nonproliferative diabetic retinopathy without macular edema                    |
| E13.3491 | Other specified diabetes mellitus with severe nonproliferative diabetic retinopathy without macular edema, right eye         |
| E13.3492 | Other specified diabetes mellitus with severe nonproliferative diabetic retinopathy without macular edema, left eye          |
| E13.3493 | Other specified diabetes mellitus with severe nonproliferative diabetic retinopathy without macular edema, bilateral         |

|          |                                                                                                                                                                            |
|----------|----------------------------------------------------------------------------------------------------------------------------------------------------------------------------|
| E13.3499 | Other specified diabetes mellitus with severe nonproliferative diabetic retinopathy without macular edema, unspecified eye                                                 |
| E13.351  | Other specified diabetes mellitus with proliferative diabetic retinopathy with macular edema                                                                               |
| E13.3511 | Other specified diabetes mellitus with proliferative diabetic retinopathy with macular edema, right eye                                                                    |
| E13.3512 | Other specified diabetes mellitus with proliferative diabetic retinopathy with macular edema, left eye                                                                     |
| E13.3513 | Other specified diabetes mellitus with proliferative diabetic retinopathy with macular edema, bilateral                                                                    |
| E13.3519 | Other specified diabetes mellitus with proliferative diabetic retinopathy with macular edema, unspecified eye                                                              |
| E13.3521 | Other specified diabetes mellitus with proliferative diabetic retinopathy with traction retinal detachment involving the macula, right eye                                 |
| E13.3522 | Other specified diabetes mellitus with proliferative diabetic retinopathy with traction retinal detachment involving the macula, left eye                                  |
| E13.3523 | Other specified diabetes mellitus with proliferative diabetic retinopathy with traction retinal detachment involving the macula, bilateral                                 |
| E13.3529 | Other specified diabetes mellitus with proliferative diabetic retinopathy with traction retinal detachment involving the macula, unspecified eye                           |
| E13.3531 | Other specified diabetes mellitus with proliferative diabetic retinopathy with traction retinal detachment not involving the macula, right eye                             |
| E13.3532 | Other specified diabetes mellitus with proliferative diabetic retinopathy with traction retinal detachment not involving the macula, left eye                              |
| E13.3533 | Other specified diabetes mellitus with proliferative diabetic retinopathy with traction retinal detachment not involving the macula, bilateral                             |
| E13.3539 | Other specified diabetes mellitus with proliferative diabetic retinopathy with traction retinal detachment not involving the macula, unspecified eye                       |
| E13.3541 | Other specified diabetes mellitus with proliferative diabetic retinopathy with combined traction retinal detachment and rhegmatogenous retinal detachment, right eye       |
| E13.3542 | Other specified diabetes mellitus with proliferative diabetic retinopathy with combined traction retinal detachment and rhegmatogenous retinal detachment, left eye        |
| E13.3543 | Other specified diabetes mellitus with proliferative diabetic retinopathy with combined traction retinal detachment and rhegmatogenous retinal detachment, bilateral       |
| E13.3549 | Other specified diabetes mellitus with proliferative diabetic retinopathy with combined traction retinal detachment and rhegmatogenous retinal detachment, unspecified eye |
| E13.3551 | Other specified diabetes mellitus with stable proliferative diabetic retinopathy, right eye                                                                                |
| E13.3552 | Other specified diabetes mellitus with stable proliferative diabetic retinopathy, left eye                                                                                 |



|          |                                                                                                                  |
|----------|------------------------------------------------------------------------------------------------------------------|
| E13.3553 | Other specified diabetes mellitus with stable proliferative diabetic retinopathy, bilateral                      |
| E13.3559 | Other specified diabetes mellitus with stable proliferative diabetic retinopathy, unspecified eye                |
| E13.359  | Other specified diabetes mellitus with proliferative diabetic retinopathy without macular edema                  |
| E13.3591 | Other specified diabetes mellitus with proliferative diabetic retinopathy without macular edema, right eye       |
| E13.3592 | Other specified diabetes mellitus with proliferative diabetic retinopathy without macular edema, left eye        |
| E13.3593 | Other specified diabetes mellitus with proliferative diabetic retinopathy without macular edema, bilateral       |
| E13.3599 | Other specified diabetes mellitus with proliferative diabetic retinopathy without macular edema, unspecified eye |
| E13.36   | Other specified diabetes mellitus with diabetic cataract                                                         |
| E13.37X1 | Other specified diabetes mellitus with diabetic macular edema, resolved following treatment, right eye           |
| E13.37X2 | Other specified diabetes mellitus with diabetic macular edema, resolved following treatment, left eye            |
| E13.37X3 | Other specified diabetes mellitus with diabetic macular edema, resolved following treatment, bilateral           |
| E13.37X9 | Other specified diabetes mellitus with diabetic macular edema, resolved following treatment, unspecified eye     |
| E13.39   | Other specified diabetes mellitus with other diabetic ophthalmic complication                                    |
| E13.40   | Other specified diabetes mellitus with diabetic neuropathy, unspecified                                          |
| E13.41   | Other specified diabetes mellitus with diabetic mononeuropathy                                                   |
| E13.42   | Other specified diabetes mellitus with diabetic polyneuropathy                                                   |
| E13.43   | Other specified diabetes mellitus with diabetic autonomic (poly)neuropathy                                       |
| E13.44   | Other specified diabetes mellitus with diabetic amyotrophy                                                       |
| E13.49   | Other specified diabetes mellitus with other diabetic neurological complication                                  |
| E13.51   | Other specified diabetes mellitus with diabetic peripheral angiopathy without gangrene                           |
| E13.52   | Other specified diabetes mellitus with diabetic peripheral angiopathy with gangrene                              |
| E13.59   | Other specified diabetes mellitus with other circulatory complications                                           |
| E13.610  | Other specified diabetes mellitus with diabetic neuropathic arthropathy                                          |
| E13.618  | Other specified diabetes mellitus with other diabetic arthropathy                                                |
| E13.620  | Other specified diabetes mellitus with diabetic dermatitis                                                       |
| E13.621  | Other specified diabetes mellitus with foot ulcer                                                                |
| E13.622  | Other specified diabetes mellitus with other skin ulcer                                                          |
| E13.628  | Other specified diabetes mellitus with other skin complications                                                  |

|         |                                                                                |
|---------|--------------------------------------------------------------------------------|
| E13.630 | Other specified diabetes mellitus with periodontal disease                     |
| E13.638 | Other specified diabetes mellitus with other oral complications                |
| E13.641 | Other specified diabetes mellitus with hypoglycemia with coma                  |
| E13.649 | Other specified diabetes mellitus with hypoglycemia without coma               |
| E13.65  | Other specified diabetes mellitus with hyperglycemia                           |
| E13.69  | Other specified diabetes mellitus with other specified complication            |
| E13.8   | Other specified diabetes mellitus with unspecified complications               |
| E13.9   | Other specified diabetes mellitus without complications                        |
| O24.011 | Pre-existing type 1 diabetes mellitus, in pregnancy, first trimester           |
| O24.012 | Pre-existing type 1 diabetes mellitus, in pregnancy, second trimester          |
| O24.013 | Pre-existing type 1 diabetes mellitus, in pregnancy, third trimester           |
| O24.019 | Pre-existing type 1 diabetes mellitus, in pregnancy, unspecified trimester     |
| O24.02  | Pre-existing type 1 diabetes mellitus, in childbirth                           |
| O24.03  | Pre-existing type 1 diabetes mellitus, in the puerperium                       |
| O24.111 | Pre-existing type 2 diabetes mellitus, in pregnancy, first trimester           |
| O24.112 | Pre-existing type 2 diabetes mellitus, in pregnancy, second trimester          |
| O24.113 | Pre-existing type 2 diabetes mellitus, in pregnancy, third trimester           |
| O24.119 | Pre-existing type 2 diabetes mellitus, in pregnancy, unspecified trimester     |
| O24.12  | Pre-existing type 2 diabetes mellitus, in childbirth                           |
| O24.13  | Pre-existing type 2 diabetes mellitus, in the puerperium                       |
| O24.311 | Unspecified pre-existing diabetes mellitus in pregnancy, first trimester       |
| O24.312 | Unspecified pre-existing diabetes mellitus in pregnancy, second trimester      |
| O24.313 | Unspecified pre-existing diabetes mellitus in pregnancy, third trimester       |
| O24.319 | Unspecified pre-existing diabetes mellitus in pregnancy, unspecified trimester |
| O24.32  | Unspecified pre-existing diabetes mellitus in childbirth                       |
| O24.33  | Unspecified pre-existing diabetes mellitus in the puerperium                   |
| O24.811 | Other pre-existing diabetes mellitus in pregnancy, first trimester             |
| O24.812 | Other pre-existing diabetes mellitus in pregnancy, second trimester            |
| O24.813 | Other pre-existing diabetes mellitus in pregnancy, third trimester             |
| O24.819 | Other pre-existing diabetes mellitus in pregnancy, unspecified trimester       |
| O24.82  | Other pre-existing diabetes mellitus in childbirth                             |
| O24.83  | Other pre-existing diabetes mellitus in the puerperium                         |

**Table S7: ICD-10 Codes to Identify Diagnosed Hypertension from the MDR**

| <b>Code</b> | <b>Description</b>                                                                                                                                              |
|-------------|-----------------------------------------------------------------------------------------------------------------------------------------------------------------|
| I10         | Essential (primary) hypertension                                                                                                                                |
| I11.0       | Hypertensive heart disease with heart failure                                                                                                                   |
| I11.9       | Hypertensive heart disease without heart failure                                                                                                                |
| I12.0       | Hypertensive chronic kidney disease with stage 5 chronic kidney disease or end stage renal disease                                                              |
| I12.9       | Hypertensive chronic kidney disease with stage 1 through stage 4 chronic kidney disease, or unspecified chronic kidney disease                                  |
| I13.0       | Hypertensive heart and chronic kidney disease with heart failure and stage 1 through stage 4 chronic kidney disease, or unspecified chronic kidney disease      |
| I13.10      | Hypertensive heart and chronic kidney disease without heart failure, with stage 1 through stage 4 chronic kidney disease, or unspecified chronic kidney disease |
| I13.11      | Hypertensive heart and chronic kidney disease without heart failure, with stage 5 chronic kidney disease, or end stage renal disease                            |
| I13.2       | Hypertensive heart and chronic kidney disease with heart failure and with stage 5 chronic kidney disease, or end stage renal disease                            |
| I15.0       | Renovascular hypertension                                                                                                                                       |
| I15.1       | Hypertension secondary to other renal disorders                                                                                                                 |
| I15.2       | Hypertension secondary to endocrine disorders                                                                                                                   |
| I15.8       | Other secondary hypertension                                                                                                                                    |
| I15.9       | Secondary hypertension, unspecified                                                                                                                             |

**Table S8: ICD-10 Codes to Identify Diagnosed Major Depression from the MDR**

| <b>Code</b> | <b>Description</b>                                                           |
|-------------|------------------------------------------------------------------------------|
| F32.0       | Major depressive disorder, single episode, mild                              |
| F32.1       | Major depressive disorder, single episode, moderate                          |
| F32.2       | Major depressive disorder, single episode, severe without psychotic features |
| F32.3       | Major depressive disorder, single episode, severe with psychotic features    |
| F32.4       | Major depressive disorder, single episode, in partial remission              |
| F32.9       | Major depressive disorder, single episode, unspecified                       |
| F33.0       | Major depressive disorder, recurrent, mild                                   |
| F33.1       | Major depressive disorder, recurrent, moderate                               |
| F33.2       | Major depressive disorder, recurrent severe without psychotic features       |
| F33.3       | Major depressive disorder, recurrent, severe with psychotic symptoms         |
| F33.41      | Major depressive disorder, recurrent, in partial remission                   |
| F33.9       | Major depressive disorder, recurrent, unspecified                            |

**Table S9: ICD-10 Codes to Identify Diagnosed HIV from the MDR**

| <b>Code</b> | <b>Description</b>                                                                         |
|-------------|--------------------------------------------------------------------------------------------|
| B20         | Human immunodeficiency virus [HIV] disease                                                 |
| B97.35      | Human immunodeficiency virus, type 2 [HIV 2] as the cause of diseases classified elsewhere |
| Z21         | Asymptomatic human immunodeficiency virus [HIV] infection status                           |

## References

1. Norton JM, Ali K, Jurkowitz CT, Kiryluk K, Park M, Kawamoto K, Shang N, Navaneethan SD, Narva AS, Drawz P: Development and Validation of a Pragmatic Electronic Phenotype for CKD. *Clinical journal of the American Society of Nephrology : CJASN*, 14: 1306-1314, 2019
